# Supplementary material for: Nanoreceptors promote mutant p53 protein degradation by mimicking selective autophagy receptors
Source: Research Square preprint supplement (doi:10.21203/rs.3.rs-1039913/v1), 2021-11-30
Supplement: Supplementary file 1 [file 30ab5cef20dc783b5e7200c0.pdf]

## SUPPLEMENTARY MATERIALS

### **Nanoreceptors promote mutant p53 protein degradation by mimicking selective autophagy receptors**

Xiaowan Huang<sup>1,#</sup>, Ziyang Cao<sup>3,#</sup>, Tao Ding<sup>1</sup>, Jieying Qian<sup>2</sup>, Hao Zhang<sup>1</sup>, Suqin Zhong<sup>1</sup>, Xiaoli Wang<sup>1</sup>, Guangyu Yao<sup>5</sup>, Xianzhu Yang<sup>2,\*</sup>, Yunjiao Zhang<sup>1,\*</sup> & Longping Wen<sup>4,\*</sup>

<sup>1</sup>School of Medicine, South China University of Technology, 510006, Guangzhou P. R. China

<sup>2</sup>School of Biomedical Sciences and Engineering, South China University of Technology, Guangzhou International Campus, 511442 Guangzhou, P. R. China

<sup>3</sup>Department of General Surgery, Guangzhou First Peoples Hospital, South China University of Technology, 510006, Guangzhou, P. R. China

<sup>4</sup>Department of Cardiology, Guangdong Provincial People's Hospital & Guangdong Academy of Medical Sciences, 510080, Guangzhou P. R. China

<sup>5</sup>Breast Center, Nanfang Hospital, Southern Medical University, 510515, Guangzhou, P. R. China

\* Correspondence and requests for materials should be addressed to or L.P. Wen (email: [lpwen@ustc.edu.cn](mailto:lpwen@ustc.edu.cn)), Y. J. Zhang (email: [zhangyunjiao@scut.edu.cn](mailto:zhangyunjiao@scut.edu.cn)) & X. Z. Yang (email: [yangxz@scut.edu.cn](mailto:yangxz@scut.edu.cn)).

# These authors contributed equally to this work

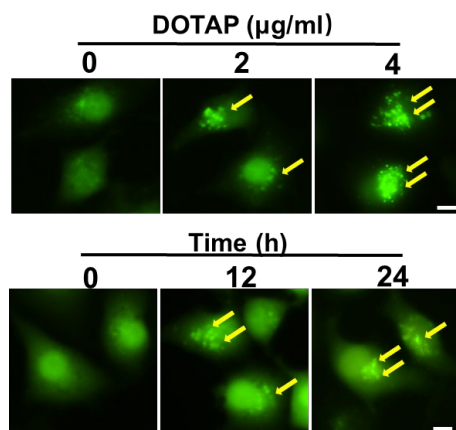

**Fig S1.** Fluorescence microscopic images of EGFP-LC3/MDA-MB-231 cells treated with DOTAP for indicate treatment. Dose: 0, 2 or 4 µg/mL of DOTAP for 12 h. Time: 0, 12 or 24 h for 2µg/mL DOTAP. Scale bar, 20 µm.

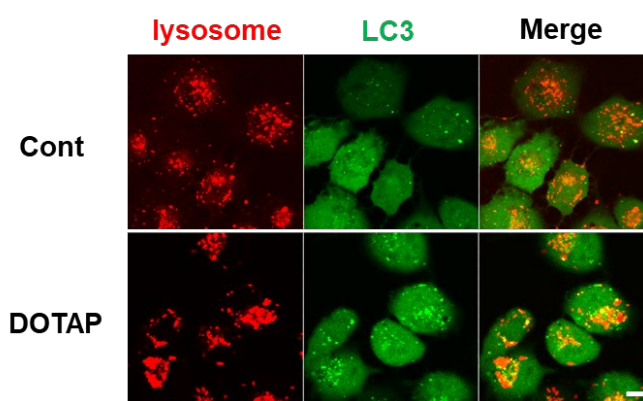

**Fig S2.** Confocal microscopic colocalization of LysoTracker and EGFP-LC3 dots in EGFP-LC3/MDA-MB-231 cells treated with PBS or DOTAP (2 µg/mL) for 24 h. Scale bar, 20 µm.

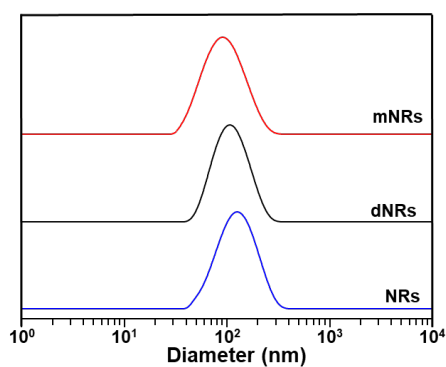

**Fig S3.** Size distribution of mNRs, dNRs and NRs determined by Dynamic Light Scattering (DLS).

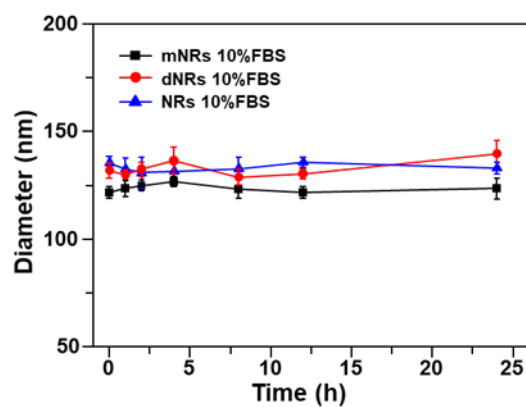

**Fig S4.** Changes in size of mNRs, dNRs and NRs after incubation in PBS containing 10% FBS.

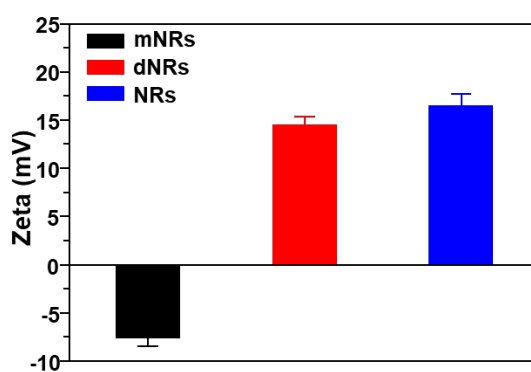

**Fig S5.** Zeta potential of mNRs, dNRs and NRs determined by Dynamic Light Scattering (DLS).

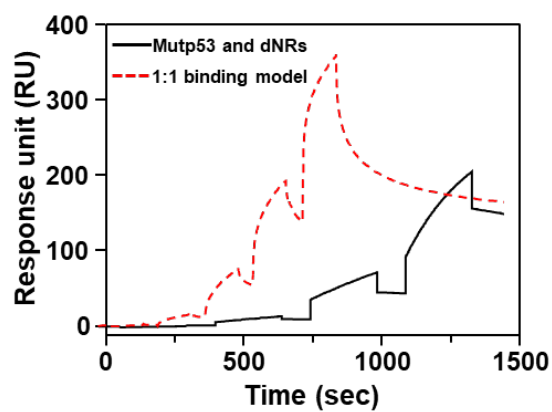

**Fig S6.** The interaction between mutp53 and dNRs was measured by surface plasmon

resonance (SPR).

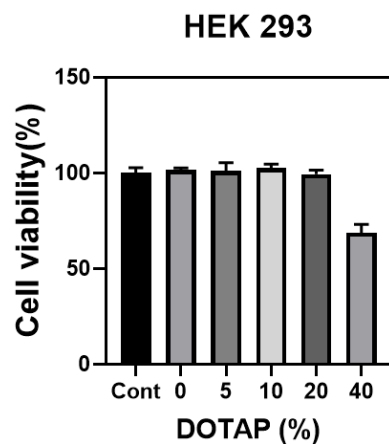

**Fig S7.** Cell viability of ES-2 cells after treatment with NRs (500  $\mu\text{g}/\text{mL}$ ) with different concentrations of DOTAP for 24 h.

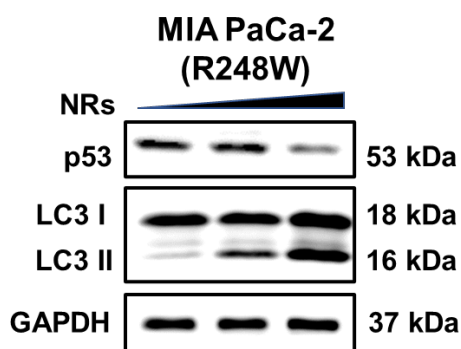

**Fig S8.** Western blotting of p53, LC3 and GAPDH in MIA PaCa-2 cells treated with 0, 250 or 500  $\mu\text{g}/\text{mL}$  of NRs for 12 h.

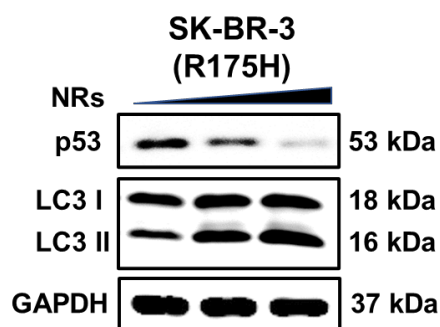

**Fig S9.** Western blotting of p53, LC3 and GAPDH in SK-BR-3 cells treated with 0, 250 or 500  $\mu\text{g}/\text{mL}$  of NRs for 12 h.

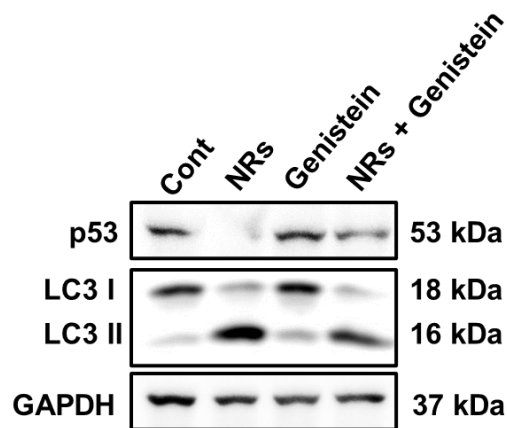

**Figure S10.** Western blotting of p53, LC3 and GAPDH in ES-2 cells after treated with 0, 100, 250 or 500  $\mu\text{g/mL}$  of NRs for 12 h.

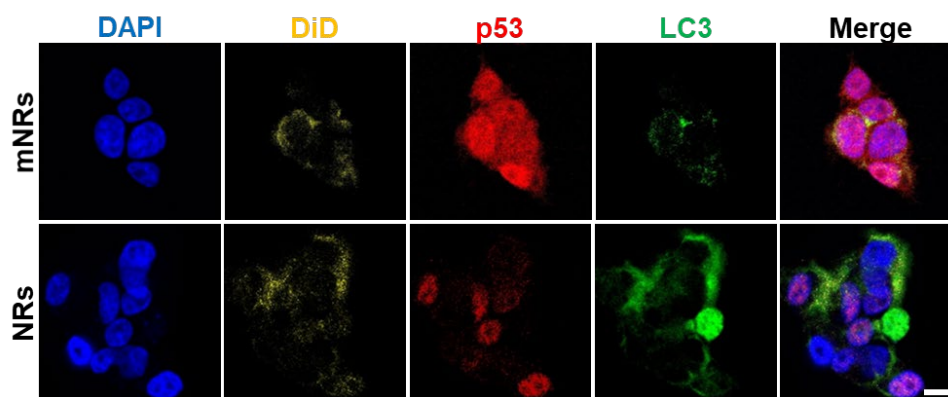

**Figure S11.** Confocal microscopy images of ES-2 cells treated with DiD-labeled mNRs or NRs (500  $\mu\text{g/mL}$ ) for 12 h, followed by immunostaining with anti-p53 and anti-LC3 antibodies. Nucleus was stained with DAPI. Scale bar, 20  $\mu\text{m}$ .

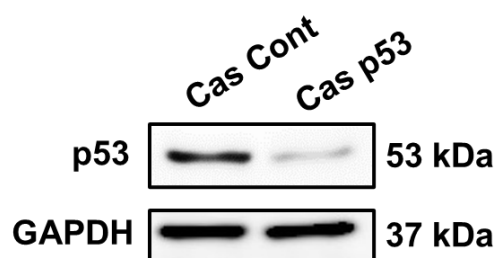

**Figure S12.** Western blotting of p53, and GAPDH in p53 knockout ES-2 cell lines by CRISPR/Cas9 technology.

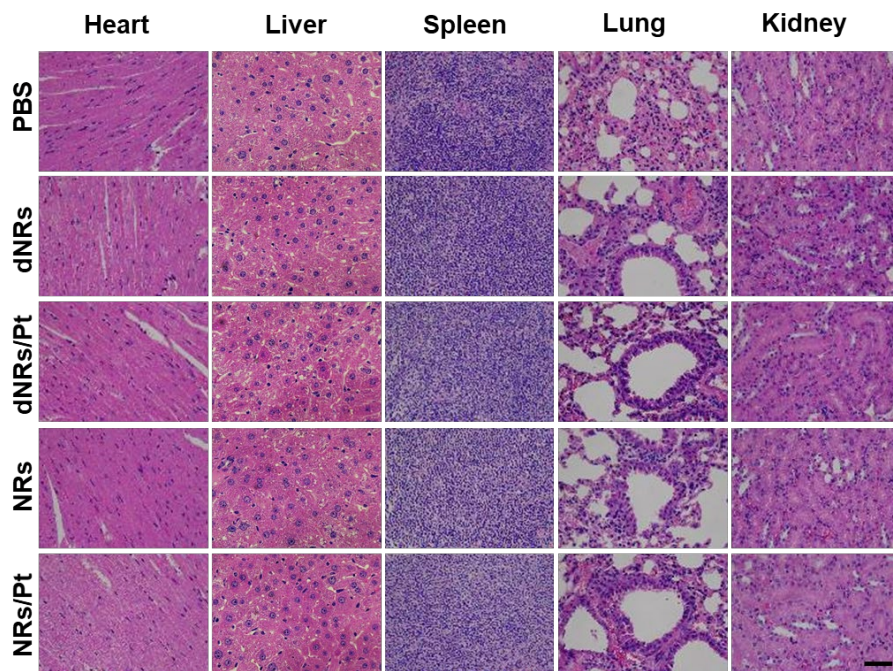

**Figure S13.** Hematoxylin & eosin (H&E) staining of representative tissue sections from the major organs of BALB/c mice after intravenous administration indicate treatment for 24 h. Dosing: 25 mg/kg for dNRs, dNRs/Pt, NRs and NRs/Pt. Scale bar: 50  $\mu$ m.

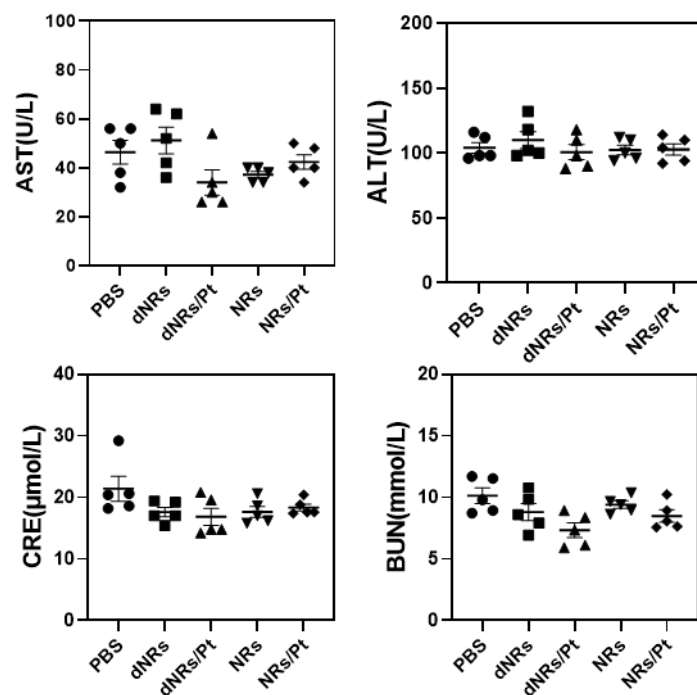

**Figure S14.** Serum level of ALT (alanine aminotransferase), AST (aspartate aminotransferase), CRE (creatinine) and BUN (blood urea nitrogen) in BALB/c mice after intravenous administration of PBS, dNRs(25 mg/kg), dNRs/Pt (25 mg/kg), NRs(25 mg/kg) or NRs/Pt (25 mg/kg) for 24 h. Mean  $\pm$  s.e.m. n=5. The normal range in female BALB/c mice: ALT, 40-170 (U/L); AST, 67-381 (U/L); BUN, 7-31 ( $\mu$ mol/L); SCR, 0.2-0.5 ( $\mu$ mol/L).

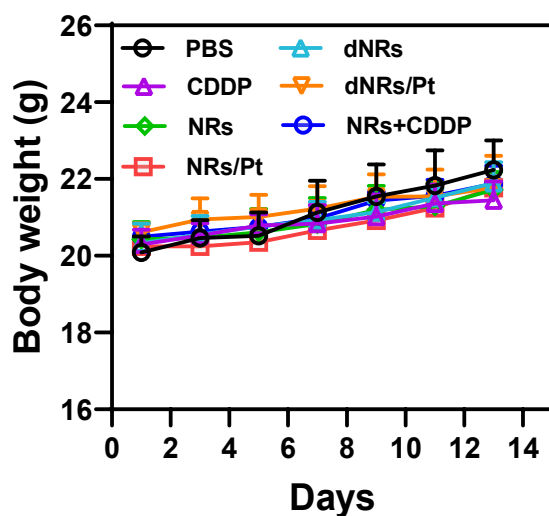

**Figure S15.** The change in body weight for the various treatment groups during the 13-day therapeutic period in the ES-2 model. Dosing: 25 mg/kg for dNRs, dNRs/Pt, NRs and NRs/Pt, 1 mg/kg for CDDP. IV injection every two days.

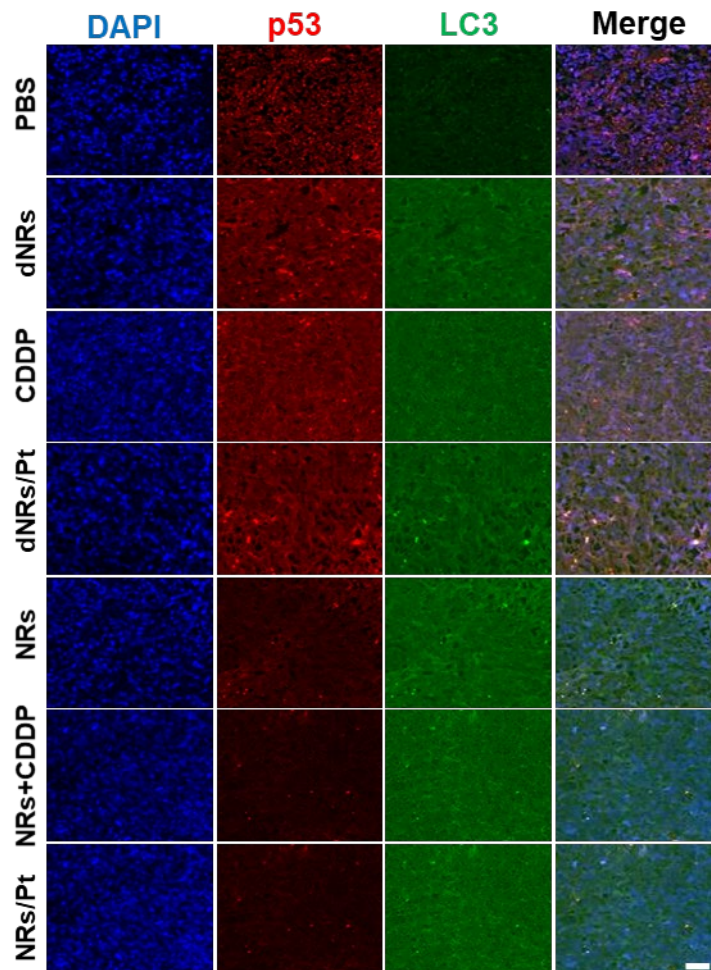

**Figure S16.** Representative immunofluorescence images of tumor tissue for the various treatment groups in the ES-2 model after staining with DAPI (nucleus) or antibodies against p53 and LC3. Dosing: 25 mg/kg for dNRs, dNRs/Pt, NRs and NRs/Pt. Scale bar, 50  $\mu$ m.



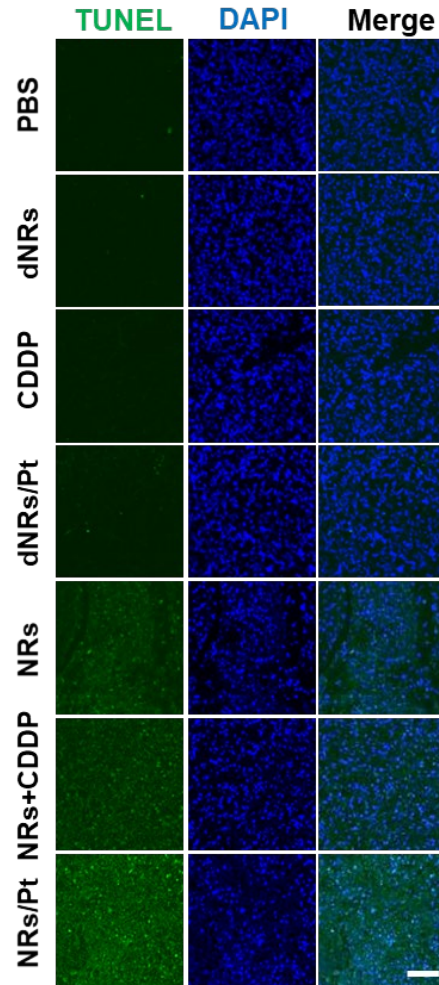

**Figure S17.** TUNEL staining (green) of sections from the various groups in the ES-2 model was performed to show apoptotic cells. Nucleus were stained with DAPI (blue). A representative image is shown for each treatment group. Scale bar, 50  $\mu$ m.

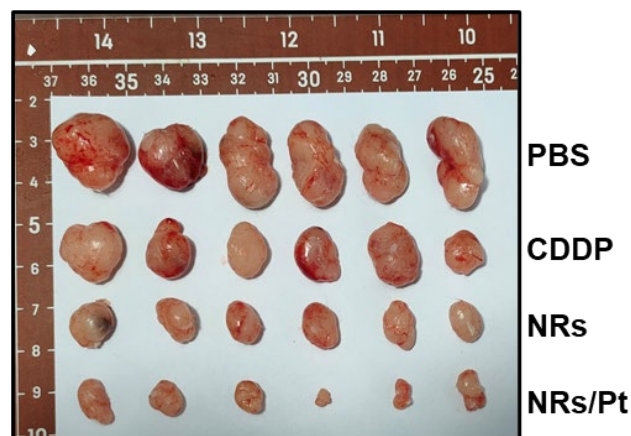

**Figure S18.** The photographs of excised tumors for the various treatment groups during the 13-day therapeutic period in the PDX model. Dosing: 25 mg/kg for dNRs, dNRs/Pt,

NRs and NRs/Pt, 1 mg/kg for CDDP. IV injection every two days.
